# Supplementary material for: An Immunogenic Cell Death‐Related Gene Signature Reflects Immune Landscape and Predicts Prognosis in Melanoma Independently of BRAF V600E Status
Source: Hindawi journal article supplement (doi:10.1155/2023/1189022), 2023-01-01
Supplement: f3 [file 1189022.f3.pdf]

**Table S1.** Clinical characteristics of SKCM patients from TCGA data in the study.

| <b>Variable</b>          | <b>No. of samples in TCGA</b> |
|--------------------------|-------------------------------|
| <b>Gender</b>            |                               |
| Male/Female              | 290/180                       |
| <b>Age at diagnosis</b>  |                               |
| <=65/>65/unknown         | 298/164/8                     |
| <b>Clinical stage</b>    |                               |
| 0/I/II/III/IV/unknown    | 7/77/140/171/23/52            |
| <b>BRAF V600E status</b> |                               |
| wild-type                | 278                           |
| mutant                   | 192                           |

SKCM, skin cutaneous melanoma; TCGA, the Cancer Genome Atlas.
